# Supplementary material for: Antiproliferative activity and toxicity evaluation of 1,2,3-triazole and 4-methyl coumarin hybrids in the MCF7 breast cancer cell line
Source: Royal Society of Chemistry journal article supplement (doi:10.1039/d3md00031a), 2023-01-01
Supplement: d3md00031a1.pdf [file d3md00031a1.pdf]

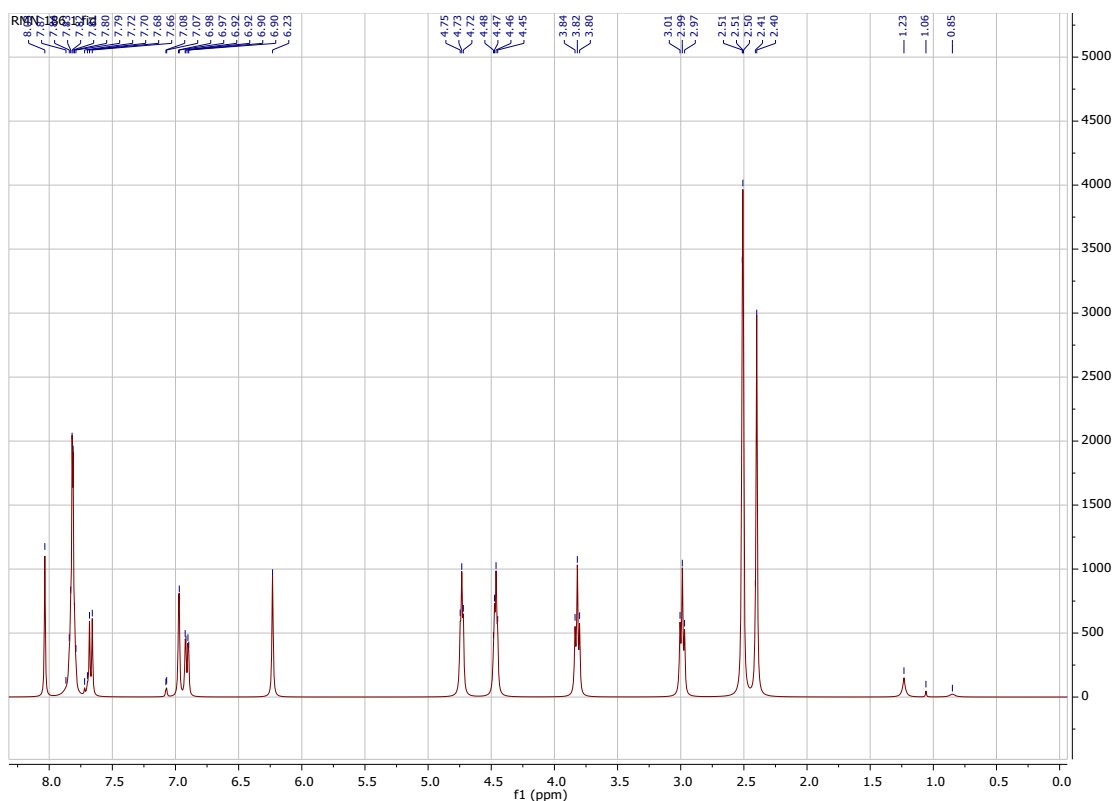

**Supplementary Information 1:**  $^1\text{H}$  NMR spectrum of LaSOM 186 (Solvent: DMSO- $d_6$ . Equipment: Bruker Avance™ III spectrometer 400 MHz, Bruker Corporation, Billerica, Massachusetts, USA)

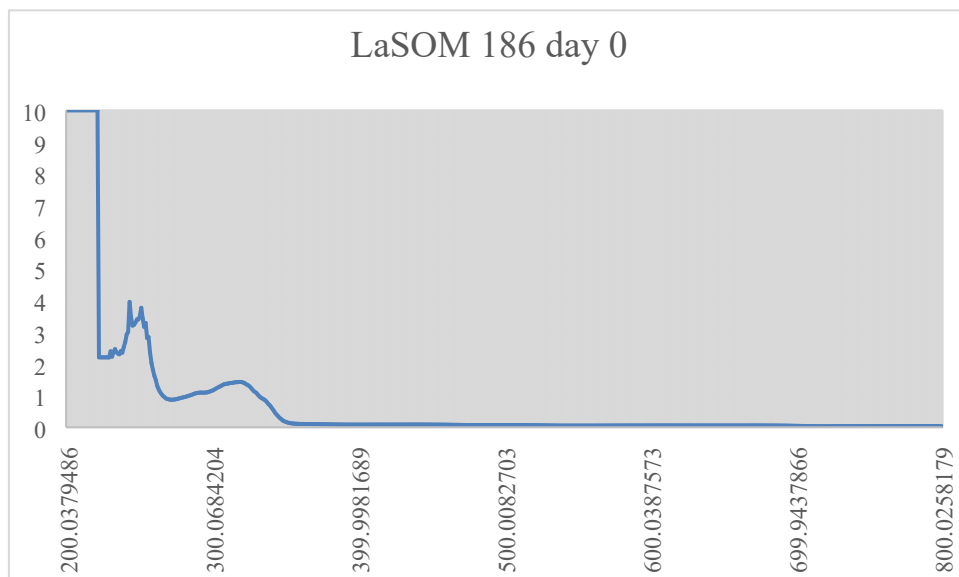

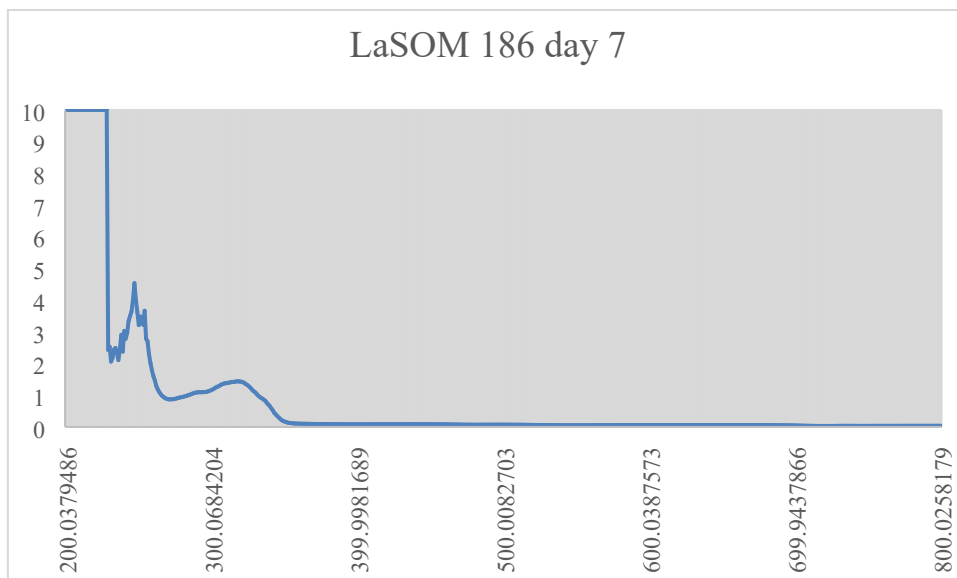

**Supplementary Information 2:** UV spectra of LaSOM 186 after 7 days (Solvent: DMSO. Equipment: Varian Cary® 50 UV-Vis Spectrophotometer, Agilent Technologies, Santa Clara, California, USA).
